# Supplementary material for: Chemical Composition and Biological Activities of Artemisia pedemontana subsp. assoana Essential Oils and Hydrolate
Source: PubMed Central journal article supplement (PMC6843530; doi:10.3390/biom9100558), 2019-10-02
Supplement: biomolecules-09-00558-s001.pdf [file biomolecules-09-00558-s001.pdf]

Supplementary Materials

**Table S1** Activity on FBIT test of *A. assoana* EOs, the major compounds 1,8-cineole and camphor, and a mixture containing 50% of each compound.

| <b>Samples</b>                     | <b>Concentration<br/>(<math>\mu\text{g/mL}</math>)</b> | <b>FBIT<br/>(%Inhibition)</b> |
|------------------------------------|--------------------------------------------------------|-------------------------------|
| <b>AasW</b>                        | 10000                                                  | 0.0                           |
|                                    | 5000                                                   | 0.0                           |
|                                    | 2500                                                   | 0.0                           |
| <b>AasA</b>                        | 10000                                                  | 35.61 $\pm$ 7.9               |
|                                    | 5000                                                   | 0.0                           |
|                                    | 2500                                                   | 12.24 $\pm$ 4.9               |
| <b>1,8-Cineole</b>                 | 100                                                    | 0.0                           |
|                                    | 50                                                     | 0.0                           |
|                                    | 25                                                     | 0.0                           |
| <b>Camphor</b>                     | 100                                                    | 0.0                           |
|                                    | 50                                                     | 0.0                           |
|                                    | 25                                                     | 0.0                           |
| <b>1:1</b>                         | 100                                                    | 5.24 $\pm$ 2.2                |
|                                    | 50                                                     | 6.81 $\pm$ 2.85               |
|                                    | 25                                                     | 8.03 $\pm$ 3.16               |
| <b>Chloroquine<br/>diphosphate</b> | 100                                                    | 81.23 $\pm$ 0.8               |
|                                    | 50                                                     | 85.32 $\pm$ 0.7               |
|                                    | 25                                                     | 74.97 $\pm$ 9.06              |
|                                    | 12.5                                                   | 45.39 $\pm$ 14.9              |
|                                    | 6.2                                                    | 14.11 $\pm$ 10.1              |
|                                    | 3.1                                                    | 9.64 $\pm$ 3.1                |

**Table S2** Egg hatching inhibition effects of AasA hydrolate on *Meloidogyne javanica* egg masses with time.

| Treatment          | Number of egg hatched <sup>a</sup> with time <sup>b</sup> |       |        |        |        |
|--------------------|-----------------------------------------------------------|-------|--------|--------|--------|
|                    | Day 0                                                     | Day 7 | Day 14 | Day 21 | Day 28 |
| HaasA <sup>c</sup> | 128.5                                                     | 318.5 | 228.7  | 21     | 0.25   |
| Control            | 182.5                                                     | 280.5 | 157.2  | 28.5   | 3      |

<sup>a</sup> Values are means of four replicates. <sup>b</sup>time 0: after 5 days of immersion in test solutions; time 7 and subsequent times: number of days of immersion in water after time 0.  
<sup>c</sup>Undiluted hydrolate.
